# Supplementary material for: Improving ITC studies of cyclodextrin inclusion compounds by global analysis of conventional and non-conventional experiments
Source: PubMed Central journal article supplement (PMC4273236; doi:10.3762/bjoc.10.275), 2014-11-11
Supplement: Beilstein_J_Org_Chem-10-2630-s001.pdf [file Beilstein_J_Org_Chem-10-2630-s001.pdf]

# Supporting Information

for

## Improving ITC studies of cyclodextrin inclusion compounds by global analysis of conventional and non-conventional experiments

Eléonore Bertaut<sup>1,2</sup>, David Landy<sup>1,2</sup> \*

Address: <sup>1</sup> Univ Lille Nord de France, F-59000 Lille, France and <sup>2</sup> ULCO, UCEIV, F-59140 Dunkerque, France

Email: David Landy - landy@univ-littoral.fr

\* Corresponding author

**Complementary data of uncertainty on  $K$  and  $\Delta H$  for various protocols**

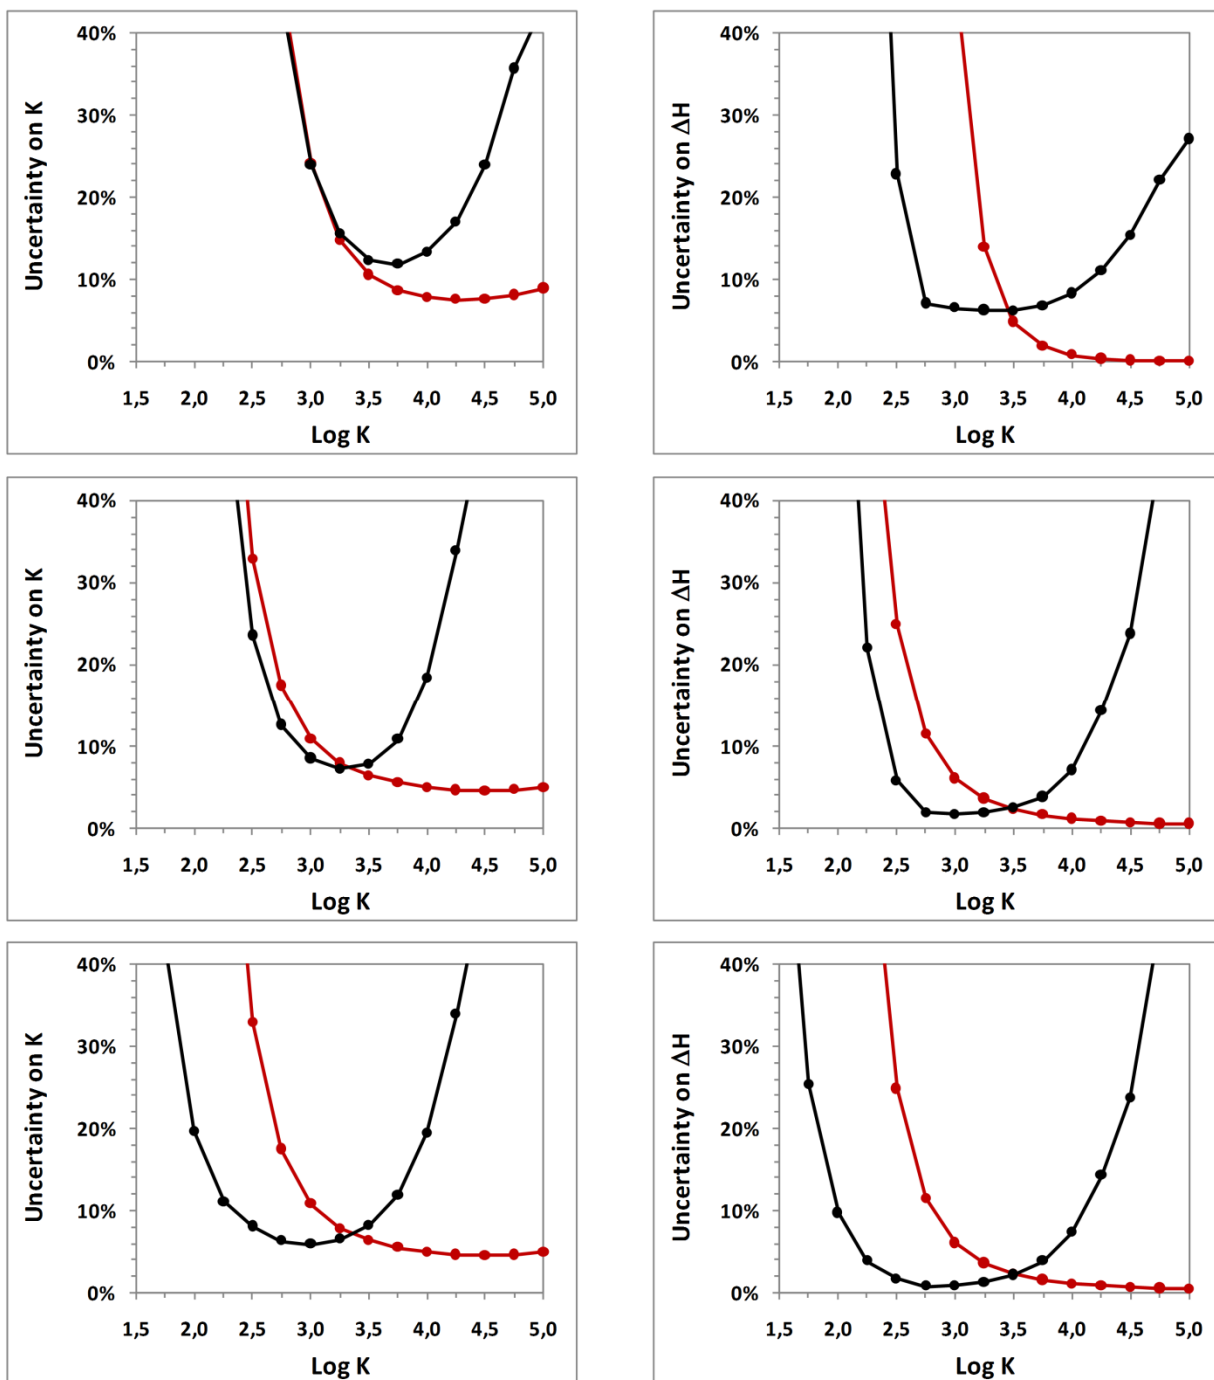

**Figure S1:** Theoretical uncertainty on  $K$  and  $\Delta H$  as a function of  $\log K$  for titration (red curve) and release (black curve) protocols, for aqueous guest solubility equal to 0.1 (top), 0.5 (middle) and 5 mM (bottom) and for an inclusion enthalpy equal to  $-3000 \text{ cal}\cdot\text{mol}^{-1}$  (Total concentrations considered as perfectly known).

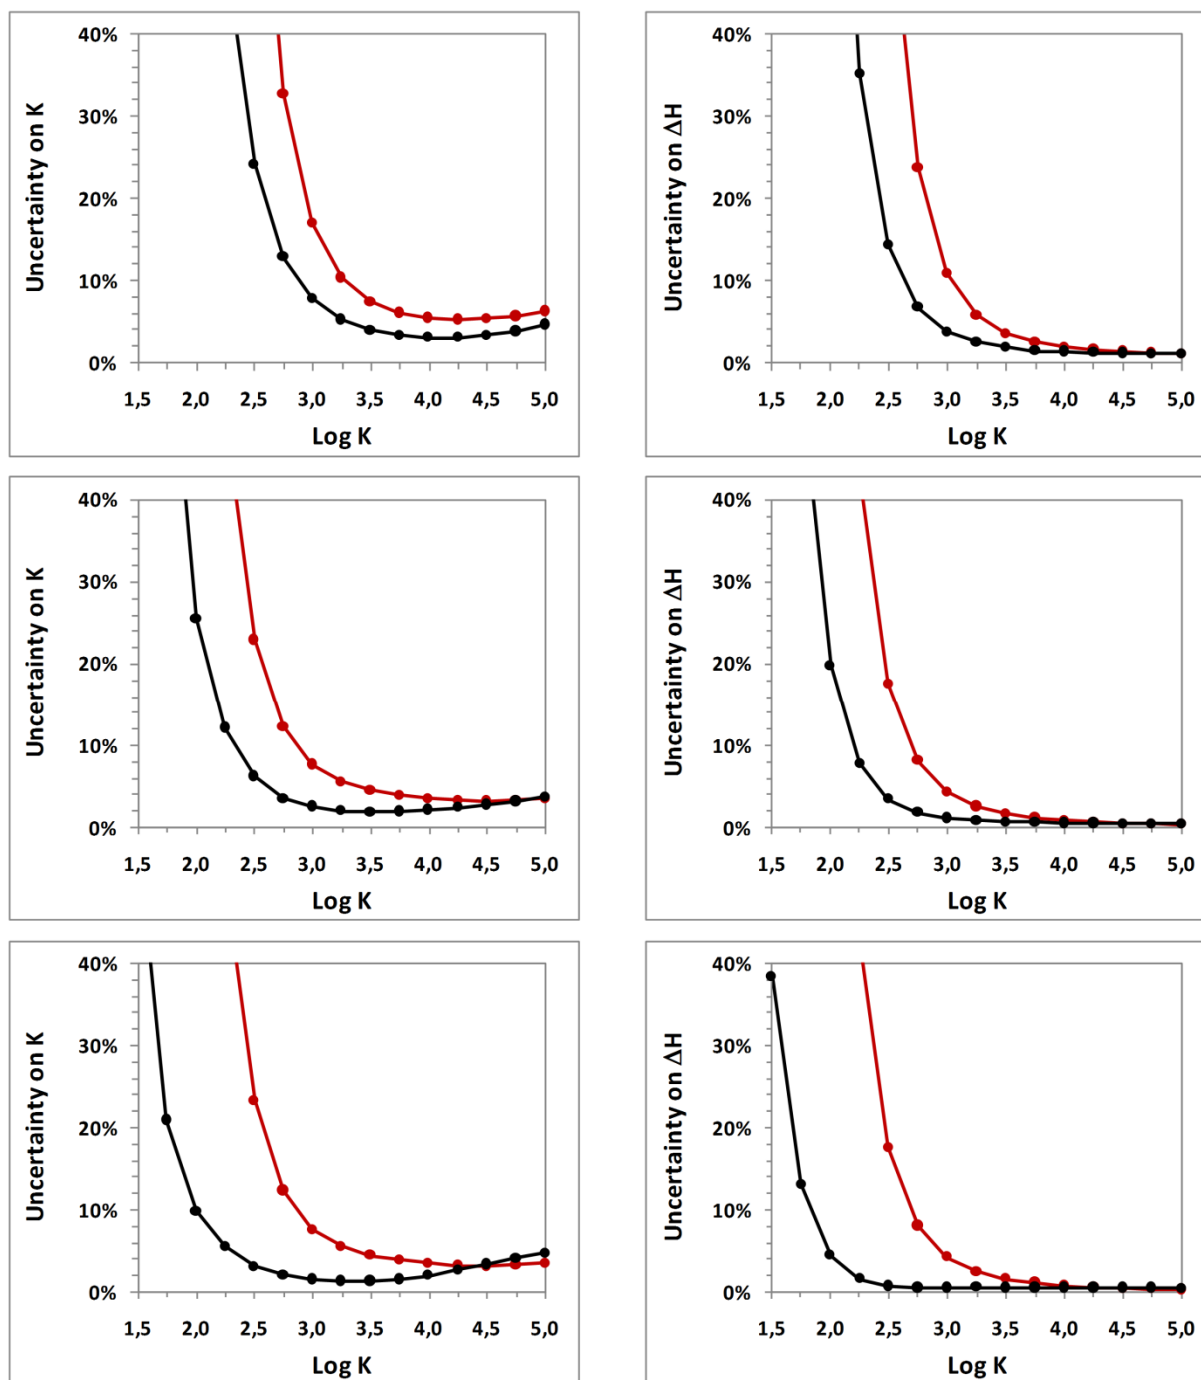

**Figure S2:** Theoretical uncertainty on  $K$  and  $\Delta H$  as a function of  $\log K$  for titration-titration (red curve) and titration-release (black curve) approaches, for an aqueous guest solubility equal to 0.1 (top), 0.5 (middle) and 5 mM (bottom) and for an inclusion enthalpy equal to  $-3000 \text{ cal}\cdot\text{mol}^{-1}$  (Total concentrations considered as perfectly known).

**Table S1:** Theoretical uncertainties on  $K$  for titration-titration, titration-release and reverse titration-annihilated release approaches (aqueous guest solubility equal to 2 mM, inclusion enthalpy equal to  $-3000 \text{ cal}\cdot\text{mol}^{-1}$ ). Total concentrations considered as perfectly known.

| Log K | K ( $\text{M}^{-1}$ ) | Titration-titration |                     | Titration-release |                     | reverse titration-annihilated release |                     |
|-------|-----------------------|---------------------|---------------------|-------------------|---------------------|---------------------------------------|---------------------|
|       |                       | $t^*\delta K$       | $t^*\delta\Delta H$ | $t^*\delta K$     | $t^*\delta\Delta H$ | $t^*\delta K$                         | $t^*\delta\Delta H$ |
| 1,50  | 32                    | >100%               | >100%               | 93%               | 75%                 | 37%                                   | 34%                 |
| 1,75  | 56                    | >100%               | >100%               | 38%               | 26%                 | 17%                                   | 13%                 |
| 2,00  | 100                   | >100%               | >100%               | 16%               | 9%                  | 8%                                    | 6%                  |
| 2,25  | 178                   | 51%                 | 43%                 | 8%                | 3%                  | 4%                                    | 3%                  |
| 2,50  | 316                   | 23%                 | 18%                 | 4%                | 1%                  | 3%                                    | 2%                  |
| 2,75  | 562                   | 12%                 | 8%                  | 2%                | 1%                  | 3%                                    | 1%                  |
| 3,00  | 1000                  | 8%                  | 4%                  | 2%                | 1%                  | 3%                                    | 1%                  |
| 3,25  | 1778                  | 6%                  | 3%                  | 2%                | 1%                  | 4%                                    | 1%                  |
| 3,50  | 3162                  | 4%                  | 2%                  | 2%                | 1%                  | 4%                                    | 1%                  |
| 3,75  | 5623                  | 4%                  | 1%                  | 2%                | 1%                  | 5%                                    | 1%                  |
| 4,00  | 10000                 | 3%                  | 1%                  | 2%                | 1%                  | 6%                                    | 1%                  |
| 4,25  | 17783                 | 3%                  | 1%                  | 2%                | 1%                  | 7%                                    | 1%                  |
| 4,50  | 31623                 | 3%                  | 1%                  | 3%                | 1%                  | 8%                                    | 1%                  |
| 4,75  | 56234                 | 3%                  | 1%                  | 3%                | 1%                  | 10%                                   | 1%                  |
| 5,00  | 100000                | 3%                  | 1%                  | 4%                | 1%                  | 12%                                   | 1%                  |
